# Supplementary material
Source: Springer Nature journal article supplement (https://www.springermedizin.de/resource/supplementary/12885_2012_3480_MOESM1_ESM.pdf/9463884)
Supplement: MOESM1 [file 9463884]

**Table 1:** Frequency of HPV positivity according to the type of cervical lesion found

| <b>Pathological diagnosis</b> | <b>Number (%) HPV + cases</b> | <b>Number (%) single HPV cases</b> | <b>Number (%) multiple HPV cases</b> | <b>Number (%) HPV X cases</b> |
|-------------------------------|-------------------------------|------------------------------------|--------------------------------------|-------------------------------|
| <b>Benign lesions</b>         | 19 (3.6%)                     | 19 (100%)                          | 0 (0%)                               | 1 (5.3%)                      |
| <b>CIN 1</b>                  | 349 (65.5%)                   | 242 (69.3%)                        | 107 (30.7%)                          | 5 (1.4%)                      |
| <b>CIN 2-3</b>                | 158 (29.6%)                   | 129 (81.6%)                        | 29 (18.4%)                           | 3 (1.9%)                      |
| <b>ICC</b>                    | 7 (1.3%)                      | 7 (100%)                           | 0 (0%)                               | 0 (0%)                        |
| <b>Total cases</b>            | 533 (100%)                    | 397 (74.5%)                        | 136 (25.5%)                          | 9 (1.7%)                      |

**Table 2a:** Distribution of HPV genotypes found in the study according to the pathological diagnosis

| Genotype found  | Total lesions |      |           |      |           | Benign lesions |      |           |      |           | CIN 1 |      |           |      |           |
|-----------------|---------------|------|-----------|------|-----------|----------------|------|-----------|------|-----------|-------|------|-----------|------|-----------|
|                 | N             | % *  | CI95%     | % ** | CI95%     | N              | % *  | CI95%     | % ** | CI95%     | N     | % *  | CI95%     | % ** | CI95%     |
| <b>HR-HPVs</b>  |               |      |           |      |           |                |      |           |      |           |       |      |           |      |           |
| <b>16</b>       | 188           | 35.3 | 31.2-39.5 | 26.0 | 22.9-29.4 | 3              | 15.8 | 3.4-39.6  | 15.8 | 3.4-39.6  | 91    | 26.1 | 21.5-31.0 | 18.2 | 14.9-21.9 |
| <b>18</b>       | 36            | 6.8  | 4.8-9.2   | 5.0  | 3.5-6.8   | 1              | 5.3  | 0.1-26.0  | 5.3  | 0.1-26.0  | 25    | 7.2  | 4.7-10.4  | 5.0  | 3.3-7.3   |
| <b>31</b>       | 77            | 14.4 | 11.6-17.7 | 10.7 | 8.5-13.1  | 0              | 0    | 0.0-0.0   | 0    | 0.0-0.0   | 60    | 17.2 | 13.4-21.6 | 12.0 | 9.3-15.2  |
| <b>33</b>       | 44            | 8.3  | 6.1-10.9  | 6.1  | 4.5-8.1   | 0              | 0    | 0.0-0.0   | 0    | 0.0-0.0   | 30    | 8.6  | 5.9-12.0  | 6.0  | 4.1-8.5   |
| <b>35</b>       | 9             | 1.7  | 0.8-3.2   | 1.2  | 0.6-2.4   | 0              | 0    | 0.0-0.0   | 0    | 0.0-0.0   | 6     | 1.7  | 0.6-3.7   | 1.2  | 0.4-2.6   |
| <b>39</b>       | 9             | 1.7  | 0.8-3.2   | 1.2  | 0.6-2.4   | 0              | 0    | 0.0-0.0   | 0    | 0.0-0.0   | 6     | 1.7  | 0.6-3.7   | 1.2  | 0.4-2.6   |
| <b>45</b>       | 19            | 3.6  | 2.2-5.5   | 2.6  | 1.6-4.1   | 0              | 0    | 0.0-0.0   | 0    | 0.0-0.0   | 16    | 4.6  | 2.6-7.3   | 3.2  | 1.8-5.2   |
| <b>51</b>       | 21            | 3.9  | 2.5-6.0   | 2.9  | 1.8-4.4   | 0              | 0    | 0.0-0.0   | 0    | 0.0-0.0   | 16    | 4.6  | 2.6-7.3   | 3.2  | 1.8-5.2   |
| <b>52</b>       | 41            | 7.7  | 5.6-10.3  | 5.7  | 4.1-7.6   | 0              | 0    | 0.0-0.0   | 0    | 0.0-0.0   | 26    | 7.4  | 4.9-10.7  | 5.2  | 3.4-7.5   |
| <b>56</b>       | 14            | 2.6  | 1.4-4.4   | 1.9  | 1.1-3.2   | 0              | 0    | 0.0-0.0   | 0    | 0.0-0.0   | 12    | 3.4  | 1.8-5.9   | 2.4  | 1.2-4.2   |
| <b>58</b>       | 58            | 10.9 | 8.4-13.8  | 8.0  | 6.2-10.3  | 0              | 0    | 0.0-0.0   | 0    | 0.0-0.0   | 45    | 12.9 | 9.6-16.9  | 9.0  | 6.7-11.9  |
| <b>59</b>       | 15            | 2.8  | 1.6-4.6   | 2.1  | 1.2-3.4   | 0              | 0    | 0.0-0.0   | 0    | 0.0-0.0   | 14    | 4.0  | 2.2-6.6   | 2.8  | 1.5-4.7   |
| <b>68</b>       | 28            | 5.3  | 3.5-7.5   | 3.9  | 2.6-5.6   | 0              | 0    | 0.0-0.0   | 0    | 0.0-0.0   | 24    | 6.9  | 4.5-10.1  | 4.8  | 3.1-7.1   |
| <b>PHR-HPVs</b> |               |      |           |      |           |                |      |           |      |           |       |      |           |      |           |
| <b>53</b>       | 37            | 6.9  | 4.9-9.4   | 5.1  | 3.6-7.0   | 1              | 5.3  | 0.1-26.0  | 5.3  | 0.1-26.0  | 32    | 9.2  | 6.4-12.7  | 6.4  | 4.4-8.9   |
| <b>66</b>       | 32            | 6.0  | 4.1-8.4   | 4.4  | 3.1-6.2   | 0              | 0    | 0.0-0.0   | 0    | 0.0-0.0   | 30    | 8.6  | 5.9-12.0  | 6.0  | 4.1-8.5   |
| <b>LR-HPVs</b>  |               |      |           |      |           |                |      |           |      |           |       |      |           |      |           |
| <b>6</b>        | 45            | 8.4  | 6.2-11.1  | 6.2  | 4.6-8.3   | 8              | 42.1 | 20.3-66.5 | 42.1 | 20.3-66.5 | 32    | 9.2  | 6.4-12.7  | 6.4  | 4.4-8.9   |
| <b>11</b>       | 31            | 5.8  | 4.0-8.2   | 4.3  | 2.9-6.0   | 5              | 26.3 | 9.1-51.2  | 26.3 | 9.1-51.2  | 20    | 5.7  | 3.5-8.7   | 4.0  | 2.5-6.1   |
| <b>42</b>       | 3             | 0.6  | 0.1-1.6   | 0.4  | 0.1-1.2   | 0              | 0    | 0.0-0.0   | 0    | 0.0-0.0   | 3     | 0.9  | 0.2-2.5   | 0.6  | 0.1-1.7   |
| <b>43</b>       | 1             | 0.2  | 0.0-1.0   | 0.1  | 0.0-0.8   | 0              | 0    | 0.0-0.0   | 0    | 0.0-0.0   | 1     | 0.3  | 0.0-1.6   | 0.2  | 0.0-1.1   |
| <b>44</b>       | 5             | 0.9  | 0.3-2.2   | 0.7  | 0.2-1.6   | 0              | 0    | 0.0-0.0   | 0    | 0.0-0.0   | 5     | 1.4  | 0.5-3.3   | 1.0  | 0.3-2.3   |
| <b>X</b>        | 9             | 1.7  | 0.8-3.2   | 1.2  | 0.6-2.4   | 1              | 5.3  | 0.1-26.0  | 5.3  | 0.1-26.0  | 5     | 1.4  | 0.5-3.3   | 1.0  | 0.3-2.3   |

N: total number of times which each genotype was detected.

\* Percentages referred to the number of lesions infected by one or several genotypes (533 Total lesions, 19 benign lesions and 349 CIN 1).

\*\* Percentages referred to the total number of virus detected (722 viruses in the Total of lesions, 19 in the Benign lesions and 499 in CIN 1).

CI95%: 95% confidence intervals used for estimate percentages.

**Table 2b:** Distribution of HPV genotypes found in the study according to the pathological diagnosis

| Genotype found  | CIN 2-3 |      |           |      |           | Invasive carcinoma |      |           |      |           |
|-----------------|---------|------|-----------|------|-----------|--------------------|------|-----------|------|-----------|
|                 | N       | % *  | CI95%     | % ** | CI95%     | N                  | % *  | CI95%     | % ** | CI95%     |
| <b>HR-HPVs</b>  |         |      |           |      |           |                    |      |           |      |           |
| <b>16</b>       | 89      | 56.3 | 48.2-64.2 | 45.2 | 38.1-52.4 | 5                  | 71.4 | 29.0-96.3 | 71.4 | 29.0-96.3 |
| <b>18</b>       | 9       | 5.7  | 2.6-10.5  | 4.6  | 2.1-8.5   | 1                  | 14.3 | 0.4-57.9  | 14.3 | 0.4-57.9  |
| <b>31</b>       | 17      | 10.8 | 6.4-16.7  | 8.6  | 5.1-13.5  | 0                  | 0    | 0.0-0.0   | 0    | 0.0-0.0   |
| <b>33</b>       | 14      | 8.9  | 4.9-14.4  | 7.1  | 3.9-11.6  | 0                  | 0    | 0.0-0.0   | 0    | 0.0-0.0   |
| <b>35</b>       | 3       | 1.9  | 0.4-5.4   | 1.5  | 0.3-4.4   | 0                  | 0    | 0.0-0.0   | 0    | 0.0-0.0   |
| <b>39</b>       | 3       | 1.9  | 0.4-5.4   | 1.5  | 0.3-4.4   | 0                  | 0    | 0.0-0.0   | 0    | 0.0-0.0   |
| <b>45</b>       | 3       | 1.9  | 0.4-5.4   | 1.5  | 0.3-4.4   | 0                  | 0    | 0.0-0.0   | 0    | 0.0-0.0   |
| <b>51</b>       | 5       | 3.2  | 1.0-7.2   | 2.5  | 0.8-5.8   | 0                  | 0    | 0.0-0.0   | 0    | 0.0-0.0   |
| <b>52</b>       | 15      | 9.5  | 5.4-15.2  | 7.6  | 4.3-12.2  | 0                  | 0    | 0.0-0.0   | 0    | 0.0-0.0   |
| <b>56</b>       | 2       | 1.3  | 0.2-4.5   | 1.0  | 0.1-3.6   | 0                  | 0    | 0.0-0.0   | 0    | 0.0-0.0   |
| <b>58</b>       | 13      | 8.2  | 4.5-13.7  | 6.6  | 3.6-11.0  | 0                  | 0    | 0.0-0.0   | 0    | 0.0-0.0   |
| <b>59</b>       | 1       | 0.6  | 0.0-3.5   | 0.5  | 0.0-2.8   | 0                  | 0    | 0.0-0.0   | 0    | 0.0-0.0   |
| <b>68</b>       | 4       | 2.5  | 0.7-6.4   | 2.0  | 0.6-5.1   | 0                  | 0    | 0.0-0.0   | 0    | 0.0-0.0   |
| <b>PHR-HPVs</b> |         |      |           |      |           |                    |      |           |      |           |
| <b>53</b>       | 4       | 2.5  | 0.7-6.4   | 2.0  | 0.6-5.1   | 0                  | 0    | 0.0-0.0   | 0    | 0.0-0.0   |
| <b>66</b>       | 2       | 1.3  | 0.2-4.5   | 1.0  | 0.1-3.6   | 0                  | 0    | 0.0-0.0   | 0    | 0.0-0.0   |
| <b>LR-HPVs</b>  |         |      |           |      |           |                    |      |           |      |           |
| <b>6</b>        | 5       | 3.2  | 1.0-7.2   | 2.5  | 0.8-5.8   | 0                  | 0    | 0.0-0.0   | 0    | 0.0-0.0   |
| <b>11</b>       | 5       | 3.2  | 1.0-7.2   | 2.5  | 0.8-5.8   | 1                  | 14.3 | 0.4-57.9  | 14.3 | 0.4-57.9  |
| <b>42</b>       | 0       | 0    | 0.0-0.0   | 0    | 0.0-0.0   | 0                  | 0    | 0.0-0.0   | 0    | 0.0-0.0   |
| <b>43</b>       | 0       | 0    | 0.0-0.0   | 0    | 0.0-0.0   | 0                  | 0    | 0.0-0.0   | 0    | 0.0-0.0   |
| <b>44</b>       | 0       | 0    | 0.0-0.0   | 0    | 0.0-0.0   | 0                  | 0    | 0.0-0.0   | 0    | 0.0-0.0   |
| <b>X</b>        | 3       | 1.9  | 0.4-5.4   | 1.5  | 0.3-4.4   | 0                  | 0    | 0.0-0.0   | 0    | 0.0-0.0   |

N: total number of times which each genotype was detected.

\* Percentages referred to the number of lesions infected by one or several genotypes (158 CIN 2-3 and 7 invasive carcinomas).

\*\* Percentages referred to the total number of virus detected (197 viruses in CIN 2-3 and 7 in Invasive carcinomas).

CI95%: 95% confidence intervals used for estimate percentages.

**Table 3:** Pathological diagnoses and co-infection occurrence

| <b>Pathological diagnosis</b> | <b>2 HPV types</b> | <b>3 HPV types</b> | <b>4 HPV types</b> | <b>5 HPV types</b> | <b>6 HPV types</b> | <b>Total</b> |
|-------------------------------|--------------------|--------------------|--------------------|--------------------|--------------------|--------------|
|                               | n° (%)             | n° (%)       |
| <b>CIN 1</b>                  | 76 (71.0%)         | 22 (20.6%)         | 7 (6.5%)           | 1 (0.9%)           | 1 (0.9%)           | 107 (78.7%)  |
| <b>CIN 2-3</b>                | 20 (69.0%)         | 8 (27.6%)          | 1 (3.4%)           | 0 (0.0%)           | 0 (0.0%)           | 29 (21.3%)   |
| <b>Total</b>                  | 96 (70.6%)         | 30 (22.1%)         | 8 (5.9%)           | 1 (0.7%)           | 1 (0.7%)           | 136 (100%)   |

Percentage referred to total of co-infections (n = 136).

**Table 4:** HPV genotype distribution in coinfection cases

| Genotype found  | CIN 1 |      |           |      |           | CIN 2-3 |      |           |      |           |
|-----------------|-------|------|-----------|------|-----------|---------|------|-----------|------|-----------|
|                 | N     | % *  | CI95%     | % ** | CI95%     | N       | % *  | CI95%     | % ** | CI95%     |
| <b>HR-HPVs</b>  |       |      |           |      |           |         |      |           |      |           |
| <b>16</b>       | 42    | 39.3 | 30.0-49.2 | 16.3 | 12.0-21.4 | 16      | 55.2 | 35.7-73.6 | 23.5 | 14.1-35.4 |
| <b>18</b>       | 12    | 11.2 | 5.9-18.8  | 4.7  | 2.4-8.0   | 3       | 10.3 | 2.2-27.4  | 4.4  | 0.9-12.4  |
| <b>31</b>       | 27    | 25.2 | 17.3-34.6 | 10.5 | 7.0-14.9  | 5       | 17.2 | 5.8-35.8  | 7.4  | 2.4-16.3  |
| <b>33</b>       | 16    | 15.0 | 8.8-23.1  | 6.2  | 3.6-9.9   | 8       | 27.6 | 12.7-47.2 | 11.8 | 5.2-21.9  |
| <b>35</b>       | 1     | 0.9  | 0.0-5.1   | 0.4  | 0.0-2.1   | 2       | 6.9  | 0.8-22.8  | 2.9  | 0.4-10.2  |
| <b>39</b>       | 3     | 2.8  | 0.6-8.0   | 1.2  | 0.2-3.4   | 1       | 3.4  | 0.1-17.8  | 1.5  | 0.0-7.9   |
| <b>45</b>       | 11    | 10.3 | 5.2-17.7  | 4.3  | 2.2-7.5   | 3       | 10.3 | 2.2-27.4  | 4.4  | 0.9-12.4  |
| <b>51</b>       | 11    | 10.3 | 5.2-17.7  | 4.3  | 2.2-7.5   | 1       | 3.4  | 0.1-17.8  | 1.5  | 0.0-7.9   |
| <b>52</b>       | 16    | 15.0 | 8.8-23.1  | 6.2  | 3.6-9.9   | 8       | 27.6 | 12.7-47.2 | 11.8 | 5.2-21.9  |
| <b>56</b>       | 6     | 5.6  | 2.1-11.8  | 2.3  | 0.9-5.0   | 1       | 3.4  | 0.1-17.8  | 1.5  | 0.0-7.9   |
| <b>58</b>       | 19    | 17.8 | 11.0-26.3 | 7.4  | 4.5-11.3  | 6       | 20.7 | 8.0-39.7  | 8.8  | 3.3-18.2  |
| <b>59</b>       | 6     | 5.6  | 2.1-11.8  | 2.3  | 0.9-5.0   | 1       | 3.4  | 0.1-17.8  | 1.5  | 0.0-7.9   |
| <b>68</b>       | 19    | 17.8 | 11.0-26.3 | 7.4  | 4.5-11.3  | 4       | 13.8 | 3.9-31.7  | 5.9  | 1.6-14.4  |
| <b>PHR-HPVs</b> |       |      |           |      |           |         |      |           |      |           |
| <b>53</b>       | 19    | 17.8 | 11.0-26.3 | 7.4  | 4.5-11.3  | 3       | 10.3 | 2.2-27.4  | 4.4  | 0.9-12.4  |
| <b>66</b>       | 25    | 23.4 | 15.7-32.5 | 9.7  | 6.4-14.0  | 2       | 6.9  | 0.8-22.8  | 2.9  | 0.4-10.2  |
| <b>LR-HPVs</b>  |       |      |           |      |           |         |      |           |      |           |
| <b>6</b>        | 12    | 11.2 | 5.9-18.8  | 4.7  | 2.4-8.0   | 3       | 10.3 | 2.2-27.4  | 4.4  | 0.9-12.4  |
| <b>11</b>       | 5     | 4.7  | 1.5-10.6  | 1.9  | 0.6-4.5   | 1       | 3.4  | 0.1-17.8  | 1.5  | 0.0-7.9   |
| <b>42</b>       | 3     | 2.8  | 0.6-8.0   | 1.2  | 0.2-3.4   | 0       | 0    | 0.0-0.0   | 0    | 0.0-0.0   |
| <b>43</b>       | 1     | 0.9  | 0.0-5.1   | 0.4  | 0.0-2.1   | 0       | 0    | 0.0-0.0   | 0    | 0.0-0.0   |
| <b>44</b>       | 3     | 2.8  | 0.6-8.0   | 1.2  | 0.2-3.4   | 0       | 0    | 0.0-0.0   | 0    | 0.0-0.0   |
| <b>X</b>        | 0     | 0    | 0.0-0.0   | 0    | 0.0-0.0   | 0       | 0    | 0.0-0.0   | 0    | 0.0-0.0   |

N: total number of times which each genotype was detected.

\* Percentages referred to the number of lesions infected by one or several genotypes (107 CIN 1 and 29 CIN 2-3 lesions).

\*\*Percentages referred to the total number of virus detected in each kind of lesion (257 virus in CIN 1 and 68 in CIN 2-3 lesions).

CI95%: 95% confidence intervals used for estimate percentages.
